# Supplementary material for: A salicylic acid derivative extends the lifespan of Caenorhabditis elegans by activating autophagy and the mitochondrial unfolded protein response
Source: PubMed Central journal article supplement (PMC6260907; doi:10.1111/acel.12830), 2018-09-07

## Supplementary Figure 1

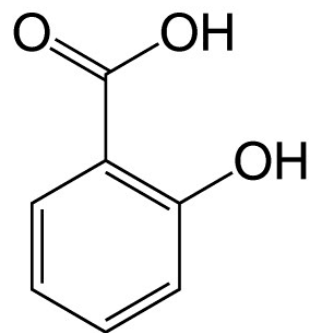

Salicylic acid

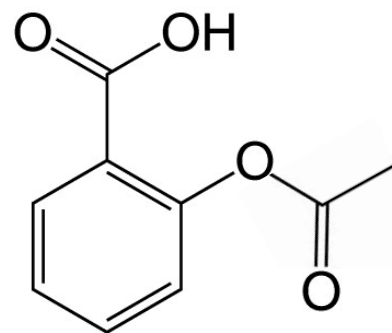

Acetylsalicylic acid

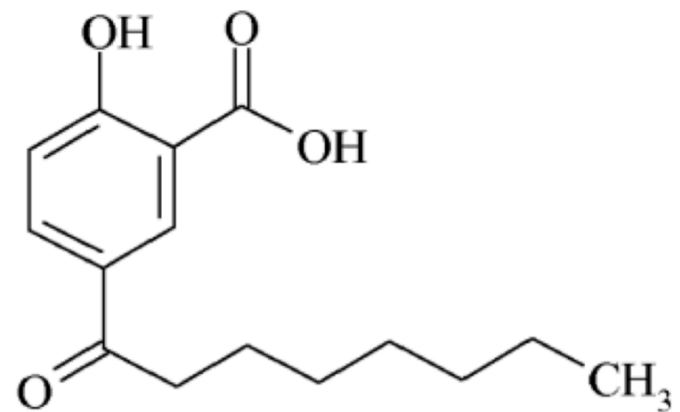

5-octanoyl salicylic acid

## Supplementary Figure 2

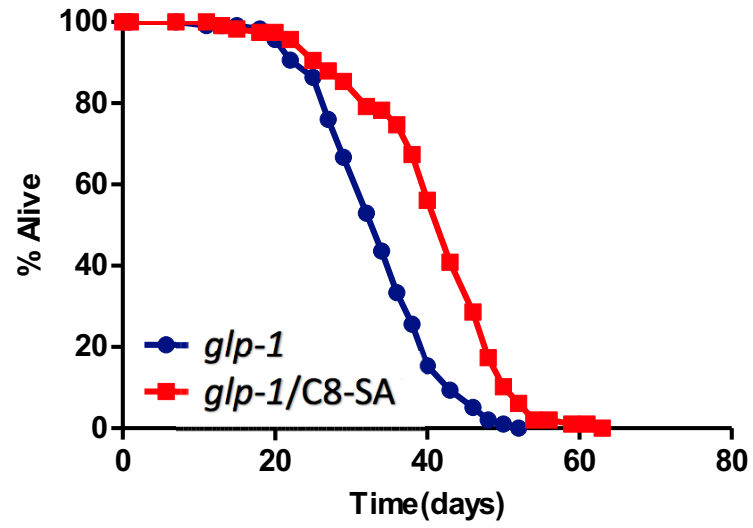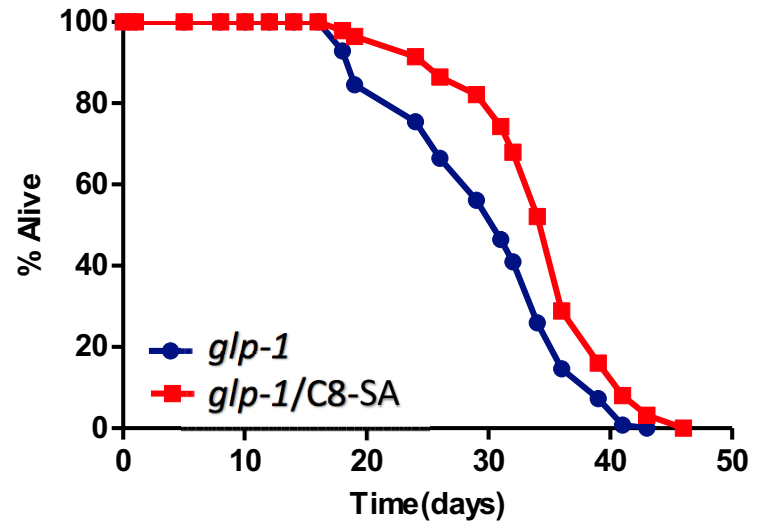

### Supplementary Figure 3

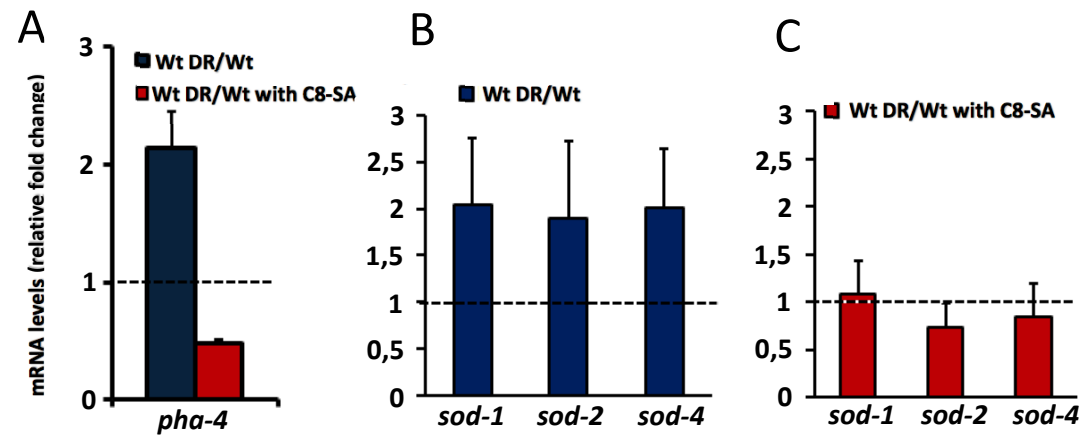

## Supplementary Figure 4

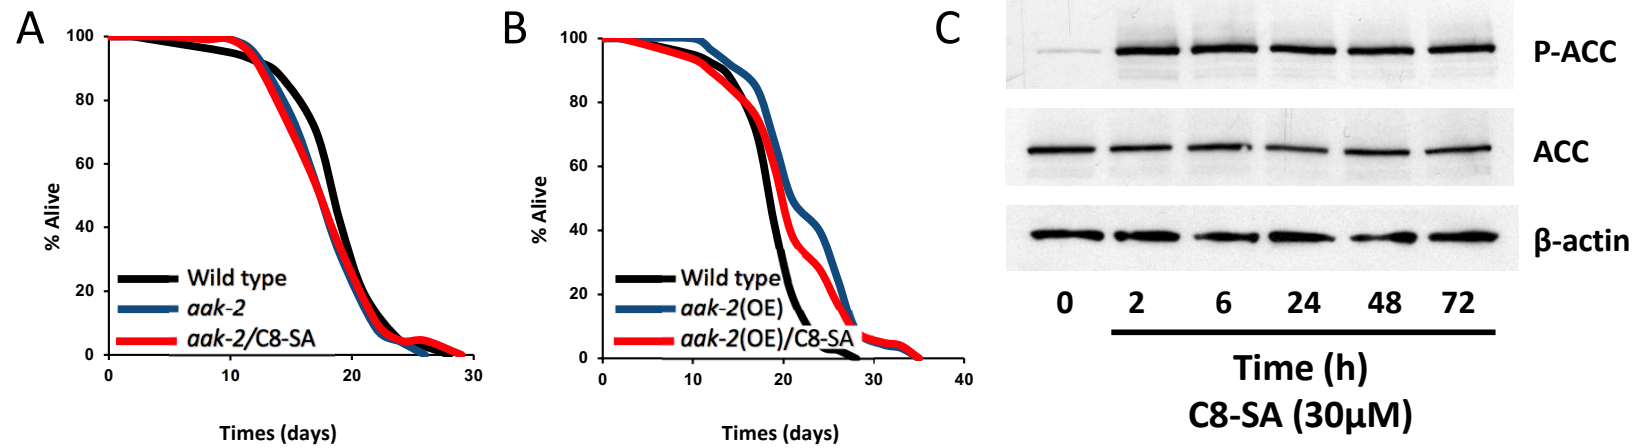

Supplement: ACEL-17-e12830-s001.pdf [file ACEL-17-e12830-s001.pdf]
